# Supplementary material for: Organosilica-based deformable nanopesticides with enhanced insecticidal activity prepared by flash nanoprecipitation
Source: Royal Society of Chemistry journal article supplement (doi:10.1039/d3re00040k), 2023-01-01
Supplement: d3re00040k1.pdf [file d3re00040k1.pdf]

## Supporting Information

### **Organosilica-based deformable nanopesticides with enhanced insecticidal activity prepared by flash nanoprecipitation**

Enguang Ma,<sup>a</sup> Zhinan Fu,<sup>\*b</sup> Liang Sun,<sup>a</sup> Kai Chen,<sup>\*a</sup> Zhiyong Liu,<sup>a</sup> Zhong Wei,<sup>a</sup>

Li Li,<sup>b</sup> and Xuhong Guo<sup>\*a, b</sup>

<sup>a</sup>School of Chemistry and Chemical Engineering/State Key Laboratory Incubation

Base for Green Processing of Chemical Engineering, Shihezi University, 832000

Xinjiang, P.R. China

<sup>b</sup>State Key Laboratory of Chemical Engineering, East China University of Science

and Technology, 200237 Shanghai, P.R. China

<sup>\*</sup>To whom correspondence should be addressed. E-mail: fuzhinan@ecust.edu.cn (Z. N. Fu), chen kai@shzu.edu.cn (K. Chen), guoxuhong@ecust.edu.cn (X. H. Guo)

Multilayer model is a commonly used but comprehensive approach for modeling the scattering intensity of silica nanoparticles.<sup>1</sup> The scattering intensity of a HMON can be split into two main contributions as follows.

$$I(q,r) = I_{cs}(q,r) + I_{in}(q) \quad (1)$$

Here,  $I_{cs}(q,r)$  is the contribution of the entire cavity-shell structure of the nanoparticle. For spherical symmetric silica nanoparticles with radius  $R$ ,  $I_{cs}(q,r)$  equals to the square of scattering amplitude  $B(q)$  which can be calculated by Eq 2.

$$B(q) = 4\pi \int_0^R [\rho^e(r) - \rho_s^e] \frac{\sin(qr)}{qr} r^2 dr \quad (2)$$

Here,  $\rho^e(r)$  is the electron density of silica nanoparticle and  $\rho_s^e$  is the electron density of solvent. Thus,  $\Delta\rho = \rho^e(r) - \rho_s^e$  denotes the excess radial electron density between silica particles and the solvent. The radius of thickness of silica shell is divided into five layers.<sup>2</sup>

The second term  $I_{in}(q)$  is originated from the static inhomogeneities which are distributed at random in the silica shell. The calculation of  $I_{in}(q)$  is expressed by Eq 3.

$$I_{in}(q) = I_{in}(0) \exp(-r_g^2 q^2) \quad (3)$$

Where is  $I_{in}(0)$  regarded as an adjustable parameter and  $r_g$  represents the radius of gyration of the static inhomogeneities.<sup>3</sup>

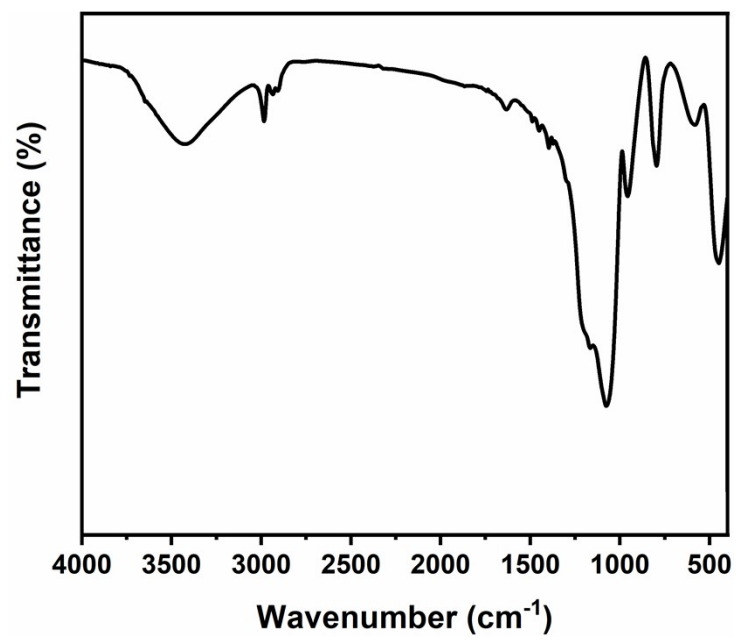

**Fig. S1.** FTIR spectra of the HMONS.

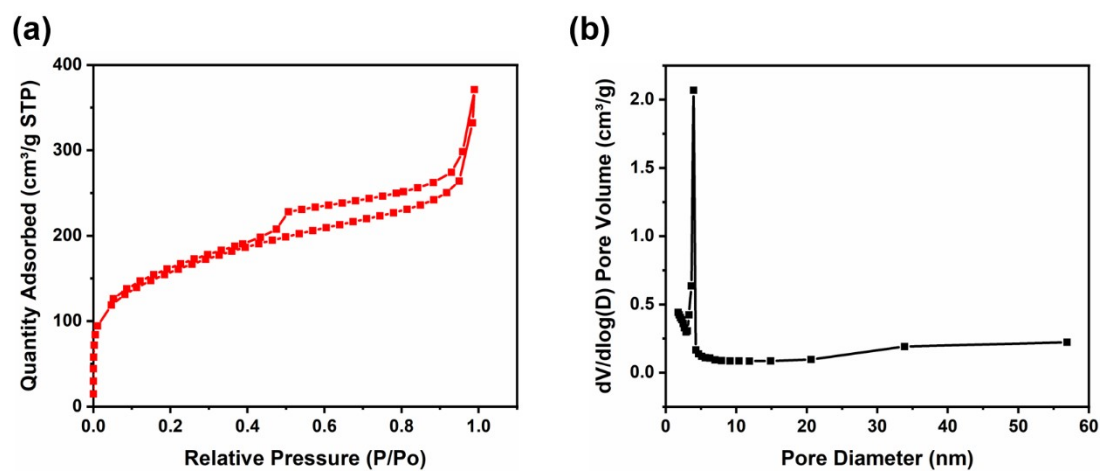

**Fig. S2.** (a) Nitrogen adsorption/desorption isotherms, (b) mesopore size distribution of the HMNs.

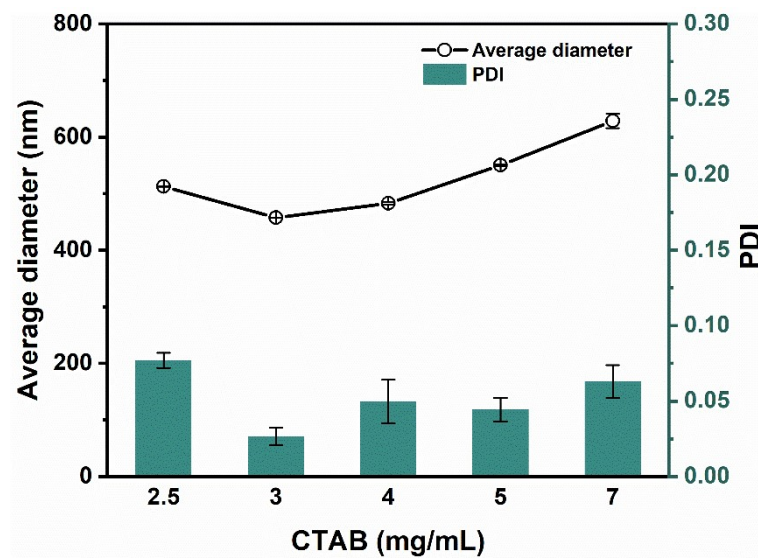

**Fig. S3.** Effect of CTAB concentration on the average particle size and PDI value\_of the HMONS.

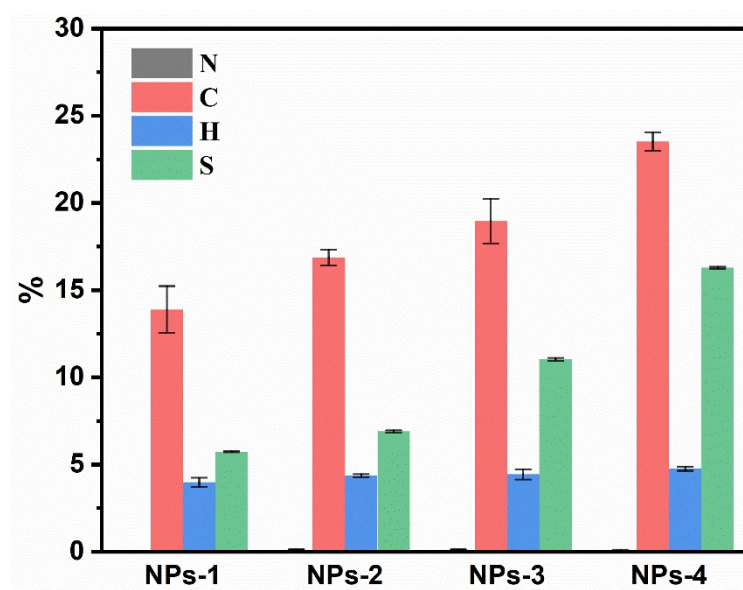

**Fig. S4.** Analysis of N, C, H, and S elements in four thioether-bridged organosilica nanoparticles.

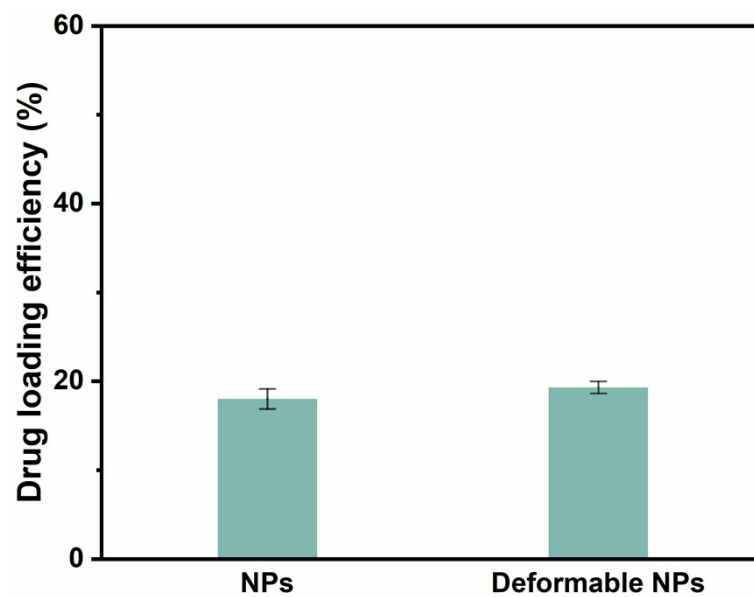

**Fig. S5.** Drug loading efficiency of different Abm-loaded NPs formulations.

**Table S1** Analysis of the elemental content of N, C, H, and S in four thioether-bridged organosilica nanoparticles

| Sample       | N (%)     | C (%)      | H (%)     | S (%)      |
|--------------|-----------|------------|-----------|------------|
| <b>NPs-1</b> | 0.03±0.03 | 13.89±1.34 | 3.99±0.26 | 5.74±0.03  |
| <b>NPs-2</b> | 0.13±0.02 | 16.88±0.46 | 4.37±0.08 | 6.90±0.06  |
| <b>NPs-3</b> | 0.12±0.02 | 18.96±1.29 | 4.47±0.29 | 11.04±0.09 |
| <b>NPs-4</b> | 0.01±0.04 | 23.53±0.53 | 4.77±0.12 | 16.29±0.06 |

## References

- (1) Yang, Q.; Li, L.; Zhao, F.; Han, H.; Wang, W.; Tian, Y.; Wang, Y.; Ye, Z.; Guo, X. *J. Mater. Sci.* 2018, **54**, 2552-2565.
- (2) Han, H.; Li, L.; Wang, W.; Tian, Y.; Wang, Y.; Wang, J.; von Klitzing, R.; Guo, X., *Langmuir*, 2017, **33**, 9857-9865.
- (3) Dingenouts, N.; Norhausen, C.; Ballauff, M., *Macromolecules*, 1998, **31**, 8912-8917.
